# Supplementary material
Source: publisher figshare collection journal article supplement (https://sage.figshare.com/ndownloader/files/18090905)
Supplement: Supplementary file 1 [file 18090905]

Supplemental table 1: ICD10 codes used to define clinical conditions and procedures

|                                        |                                                                                                                       |
|----------------------------------------|-----------------------------------------------------------------------------------------------------------------------|
| Cardiogenic Shock                      | R57.0                                                                                                                 |
| Acute Kidney Injury                    | N17, N19                                                                                                              |
| Anemia                                 | D50, D508, D509, D51, D53                                                                                             |
| Coronary artery bypass graft           | 0210, 0211, 0212, 0213                                                                                                |
| Coronary artery disease                | I20, I21, I22, I23, I24, I25                                                                                          |
| Heart failure                          | I099, I110, I130, I132, I255, I420, I425, I429, I43, I50                                                              |
| Chronic Liver Disease                  | B180, K730, K740, K700, K7010, K702, K7030, K709, K717, K713, K714, K7150, K760, K762, K763, K764, K760, K769, Z944   |
| Chronic deep vein thrombosis           | I82211, I82291, I825, I827, I82A2, I82B2, I82C2, I82891, I825, I827, I82A2, I82B2, I82C2, I82891, I8291, V1251, V1255 |
| Chronic Kidney Disease                 | I131, N18, N19, N250, Z490, Z492, Z940, Z992                                                                          |
| Coagulopathy                           | D65, D68, D66, D67, D691, D693, D696                                                                                  |
| Connective Tissue Disease              | L940, L941, L943, M05, M06, M08, M12, M123, M30, M310, M313, M32, M33, M34, M35, M45, M461, M468, M469                |
| Chronic obstructive pulmonary disease  | I278, I279, J40, J47, J60, J67, J684, J701, J703                                                                      |
| Depression                             | F204, F313, F315, F32, F33, F341, F412, F432                                                                          |
| Diabetes                               | E08, E09, E10, E11, E12, E13                                                                                          |
| Drug Abuse                             | F11, F16, F18, F19, Z715, Z722, F15, F12                                                                              |
| Acute deep vein thrombosis             | I82210, I82220, I82290, I824, I826, I82A1, I82B1, I82C1, I82890, I8290                                                |
| ECMO                                   | 5A15223                                                                                                               |
| Ethanol intake                         | F10, E52, G621, I426, K292, K700, K703, K709, T51, Z502, Z714, Z721                                                   |
| Atrial fibrillation/atrial flutter     | I48,                                                                                                                  |
| Gastrointestinal bleeding              | K9202, K9201, K9200, K625, R195, D50                                                                                  |
| Hemodialysis                           | 5A1D                                                                                                                  |
| Hyperlipidemia                         | E78                                                                                                                   |
| Hypertension                           | I10, I11, I13, I15, I16                                                                                               |
| Hypothyroidism                         | E00, E03, E01, E02, E890, E00, E01, E02, E03, E890                                                                    |
| Intraaortic balloon pump               | 5A02110, 5A02210                                                                                                      |
| Percutaneous ventricular assist device | 5A0221D, 5A0211D                                                                                                      |
| Myocarditis                            | I514, I40, I41, B3322, D8685, J1182                                                                                   |
| NSTEMI                                 | I214                                                                                                                  |
| STEMI                                  | I21, I22                                                                                                              |
| Obesity                                | E65, E66, E67, E68, Z683, Z684                                                                                        |
| Obstructive sleep apnea                | G473                                                                                                                  |
| Pulmonary embolism                     | I26                                                                                                                   |
| Pulmonary hypertension                 | I26, I27, I28, I288, I289                                                                                             |
| Vasopressors                           | 3E030XZ, 3E033XZ, 3E040XZ, 3E043XZ, 3E050XZ, 3E053XZ, 3E060XZ, 3E063XZ                                                |
| Psychosis                              | F20, F22, F25, F28, F29, F302, F312, F315,                                                                            |
| Peripheral vascular disease            | I70, I71, I731, I738, I739, I771, I790, I792, K551, K558, K559, Z958, Z959,                                           |
| Right Heart Cath                       | 4A023N6, 4A023N8                                                                                                      |
| Smoking                                | F17, Z87891, Z720, T652, V1582                                                                                        |
| Stroke                                 | I69, Z8673, I63, I97811, I97821, I6781, I6782, I6789, I60, I61, I62, V1254                                            |
| Heart Transplant                       | 02YA                                                                                                                  |
| V fib/Flutter                          | I49                                                                                                                   |
| Left ventricular assist device         | 02HA0QZ, 02HA3RZ                                                                                                      |
| Valvular heart Disease                 | I05, I06, I07, I08, I09, I39, Q230, Q233, Z952, Z954                                                                  |
| Ventilator                             | 5A19                                                                                                                  |

Supplemental table 2: Predictors of 30-day readmissions among subsets

|                                                                             | OR [95% CI]         | P value |
|-----------------------------------------------------------------------------|---------------------|---------|
| <b>ECMO post-cardiac surgery</b>                                            |                     |         |
| Length of stay                                                              | 1.02 [1-1.03]       | 0.006   |
| Medicaid as payor                                                           | 4.11 [1.39-12.1]    | 0.01    |
| Underwent LVAD                                                              | 3.59 [1.19-10.84]   | 0.023   |
| Diabetes                                                                    | 2.68 [1.18-6.05]    | 0.018   |
| Acute DVT                                                                   | 2.95 [1.14-7.58]    | 0.025   |
| Deficiency Anemia                                                           | 12.66 [0.94-171.19] | 0.056   |
| Underwent Heart Transplant                                                  | 0.16 [0.04-0.58]    | 0.006   |
| Location defined as Fringe counties of metro area of > 1 million population | 0.37 [0.14-0.97]    | 0.044   |
| Counties in metro area of 250,000-999,999 population                        | 0.14 [0.04-0.48]    | 0.002   |
| Micropolitan counties                                                       | 0.22 [0.06-0.87]    | 0.031   |
| Not metropolitan                                                            | 0.06 [0.01-0.51]    | 0.01    |
| <b>ECMO not following cardiac surgery</b>                                   |                     |         |
| Discharged to SNF                                                           | 2.11 [1.06-4.21]    | 0.03    |
| Discharged with HCC                                                         | 2.15 [1.09-4.22]    | 0.03    |
| Underwent LVAD                                                              | 2.36 [1.31-4.25]    | 0.00    |
| Asthma                                                                      | 3.69 [1.30-10.43]   | 0.01    |
| Chronic Liver Disease                                                       | 2.86 [1.06-7.72]    | 0.04    |
|                                                                             |                     |         |
|                                                                             |                     |         |

**Patient discharged with no LVAD**

|                       |                  |      |
|-----------------------|------------------|------|
| Discharged to SNF     | 2.3 [1.21-4.4]   | 0.01 |
| Discharged with HCC   | 2.19 [1.12-4.26] | 0.02 |
| Asthma                | 2.53 [0.99-6.46] | 0.05 |
| Chronic Liver Disease | 2.36 [1.03-5.41] | 0.04 |
|                       |                  |      |

**Patient who underwent LVAD during index hospitalization**

|                                 |                   |      |
|---------------------------------|-------------------|------|
| Dyslipidemia                    | 3.17 [1.2-8.4]    | 0.02 |
| Cardiac Arrest during admission | 3.96 [1.04-15.15] | 0.04 |
